# Supplementary material for: Structure–activity relationship of nanostructured ceria for the catalytic generation of hydroxyl radicals
Source: Royal Society of Chemistry journal article supplement (doi:10.1039/c8nr09393h), 2019-01-01
Supplement: c8nr09393h1.pdf [file c8nr09393h1.pdf]

# Structure-activity relationship of nanostructured ceria for the catalytic generation of hydroxyl radicals

*Tamra J. Fisher,<sup>a</sup> Yunyun Zhou,<sup>a, †</sup> Tai-Sing Wu,<sup>b</sup> Meiyu Wang,<sup>c</sup> Yun-Liang Soo,<sup>b, d</sup> and Chin Li Cheung<sup>\*, a</sup>*

a. Department of Chemistry, University of Nebraska-Lincoln, Lincoln, Nebraska 68588, United States

b. Department of Physics, National Tsing Hua University, Hsinchu 30013, Taiwan, R.O.C.

c. Department of Mechanical and Materials Engineering, University of Nebraska-Lincoln, Lincoln, Nebraska 68588, United States

d. National Synchrotron Radiation Research Centre, Hsinchu 30076, Taiwan, R.O.C.

† Present Address: National Energy Technology Laboratory, Pittsburgh, PA, 15236, United States

## ELECTRONIC SUPPLEMENTARY INFORMATION

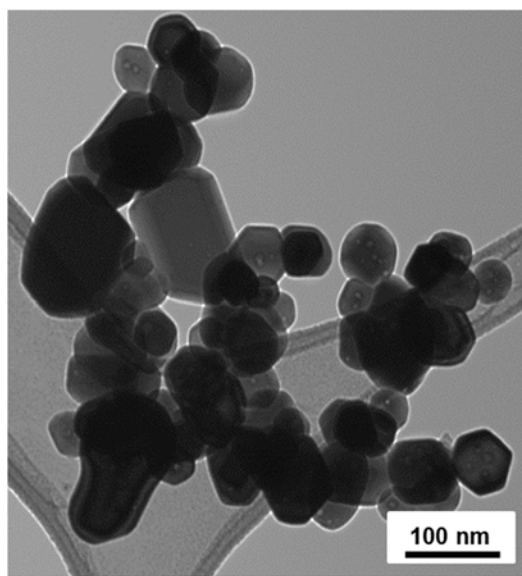

**Figure S1.** TEM image of commercial ceria particles.

---

† Present Address: National Energy Technology Laboratory, Pittsburgh, PA, 15236, United States.

\* Corresponding Author. Dr. Chin Li Cheung; Email: ccheung2@unl.edu

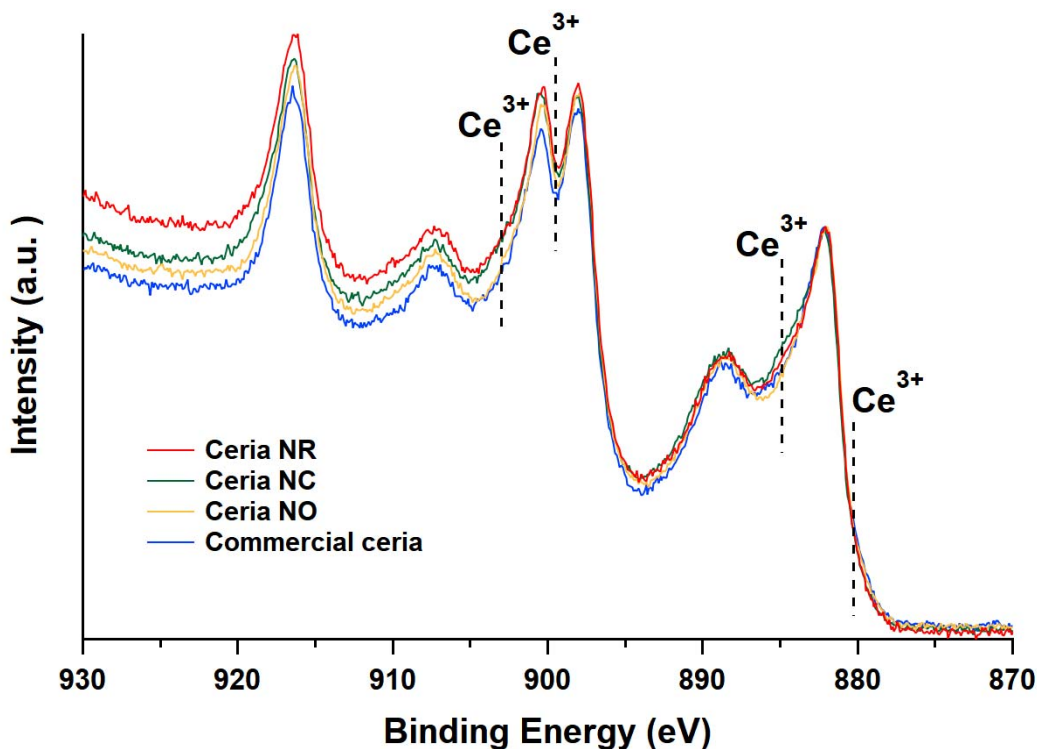

**Figure S2.** Ce 3d XPS spectra of ceria nanorods (NR), ceria nanocubes (NC), ceria nanooctahedra (NO), and commercial ceria. The spectra were normalized at 882.15 eV. The locations of the  $\text{Ce}^{3+}$  3d peaks are indicated by the dashed lines. Note: the similarities between the spectra suggests that these ceria samples have similar % of surface  $\text{Ce}^{3+}$ .

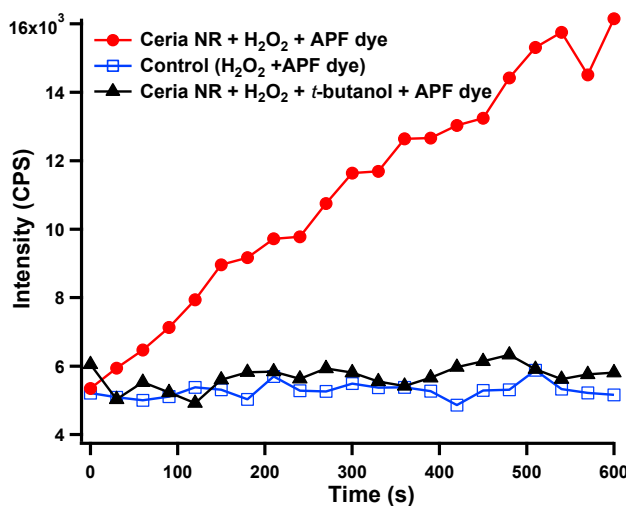

**Figure S3.** Reaction kinetics of catalytic generation of hydroxyl radicals with and without *t*-butanol as the hydroxyl radical scavenger. Reaction conditions: Reaction temperature: 21.8 °C;  $[\text{H}_2\text{O}_2] = 3 \text{ mM}$ ;  $[\text{Ceria NR}] = 0.1 \text{ g/L}$ ;  $[t\text{-butanol}] = 2 \text{ M}$ .

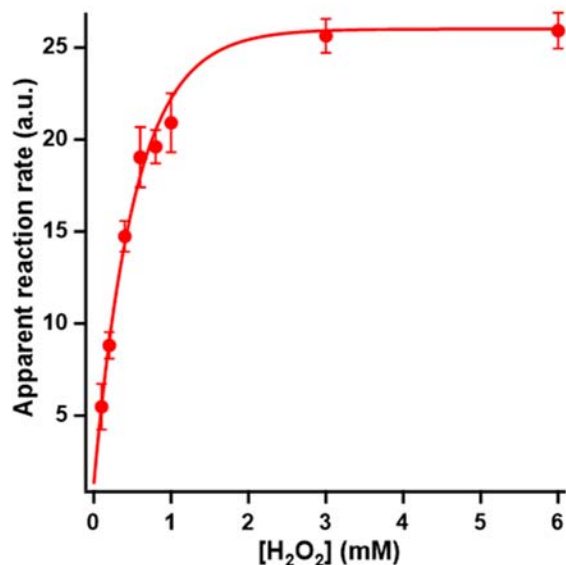

**Figure S4.** Determination of optimum [H<sub>2</sub>O<sub>2</sub>] from reaction kinetics for the catalytic generation of hydroxyl radicals from disproportionation of hydrogen peroxide using ceria nanorods. Reaction conditions: 21.8 °C, [H<sub>2</sub>O<sub>2</sub>] = 0.1 – 6 mM, [Ceria NR] = 0.1 g/L. The solid line was drawn to guide the eye on the trend line of the apparent reaction rate at higher [H<sub>2</sub>O<sub>2</sub>].

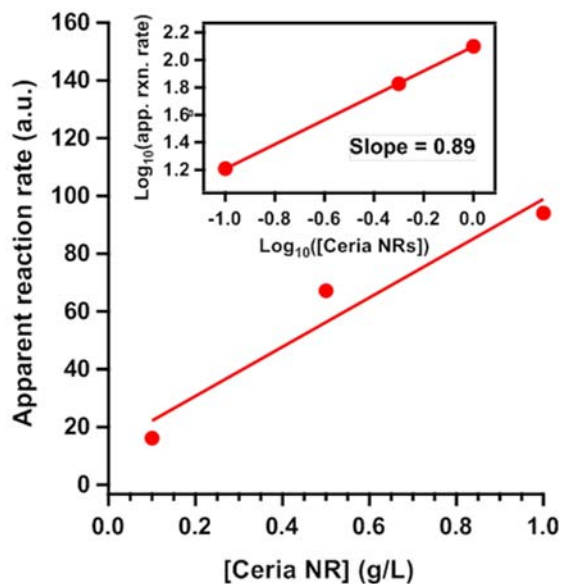

**Figure S5.** Reaction kinetics for the catalytic generation of hydroxyl radicals from disproportionation of hydrogen peroxide using ceria nanorods. (inset) Log-Log plot of the kinetics data for determining the reaction order with respect to the concentration of ceria nanorod catalysts. Reaction conditions: Reaction temperature: 21.8 °C; [H<sub>2</sub>O<sub>2</sub>] = 3 mM; [Ceria NR] = 0.1, 0.5, and 1.0 g/L.
